# Supplementary material for: Milk Quality and Safety in a One Health Perspective: Results of a Prevalence Study on Dairy Herds in Lombardy (Italy)
Source: MDPI journal article supplement (doi:10.3390/life12060786), 2022-05-25
Supplement: s1 [file s1]

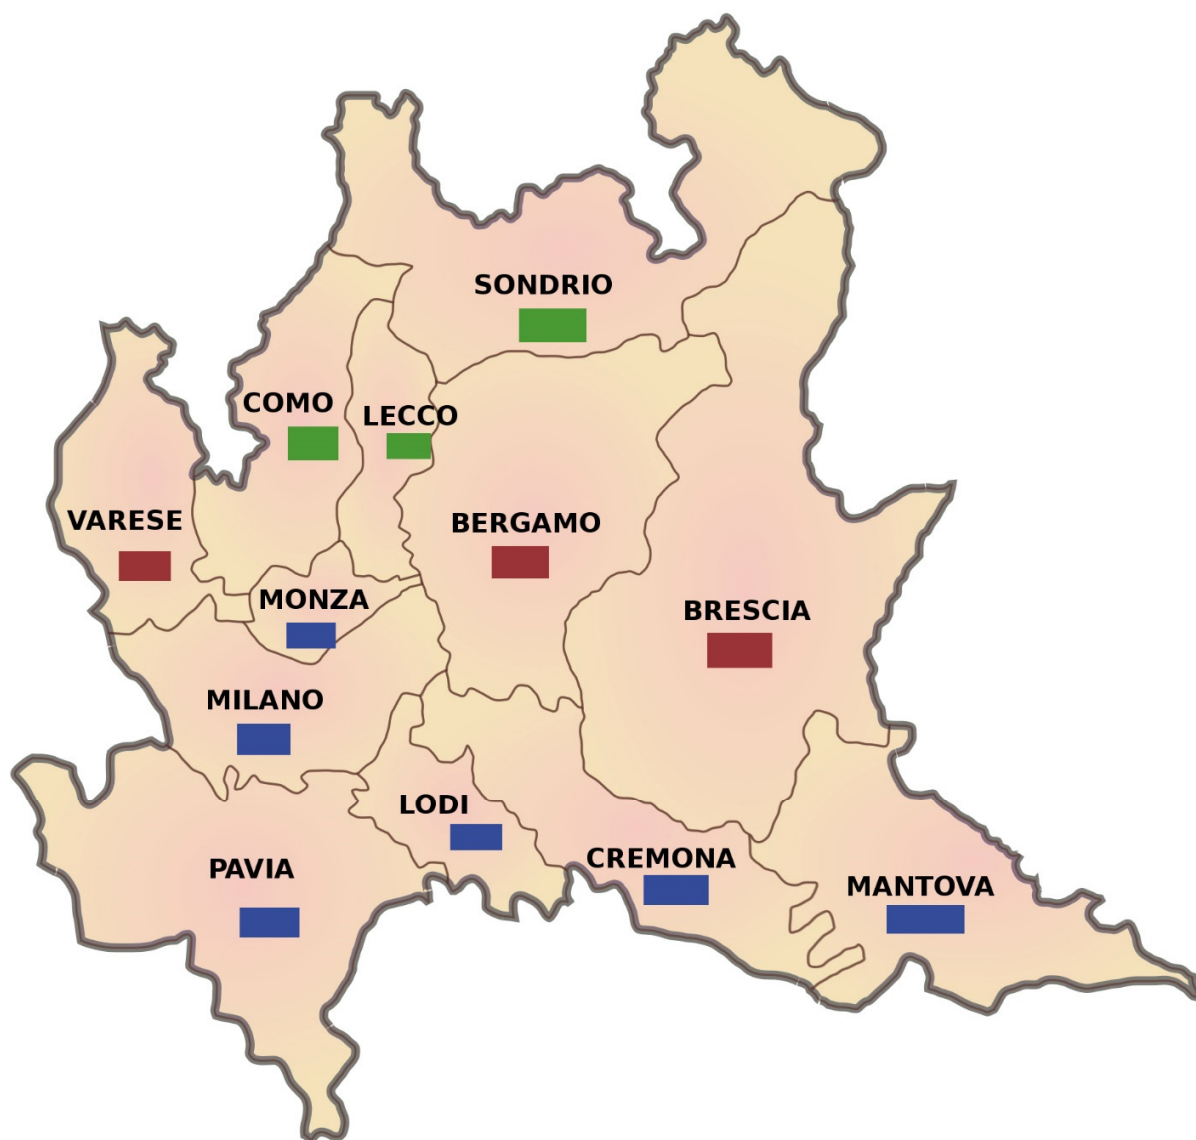

**Figure S1.** The 12 provinces of Lombardy as classified in the paper: the blue color represents the provinces classified in the Po Valley group; the red color represents the provinces classified in the Semi-alpine group and the green color represents the provinces classified in the Alpine group.

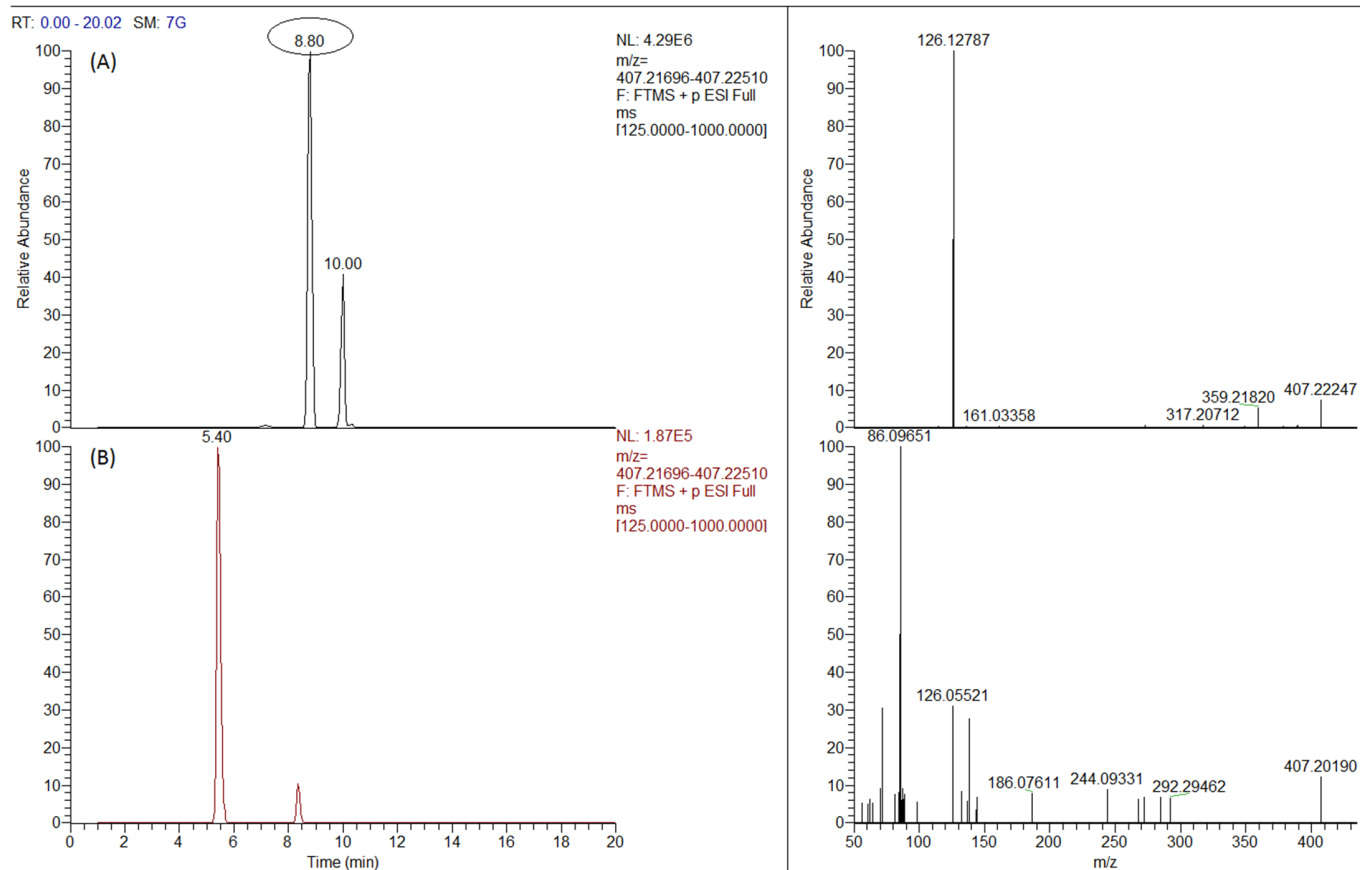

**Figure S2.** Extracted chromatogram and mass spectrum of lincomycin found in one raw bovine milk sample (A) compared with a negative sample (B).
